# Supplementary material for: Porphyrin and phthalocyanine-based metal organic frameworks beyond metal-carboxylates
Source: Royal Society of Chemistry journal article supplement (doi:10.1039/d0dt03903a), 2020-12-14
Supplement: d0dt03903a1.pdf [file d0dt03903a1.pdf]

## Porphyrin and phthalocyanine-based Metal Organic Frameworks beyond metal-carboxylates

### Supplementary Information

Chemical formula and CSD entry code of reported porphyrin and phthalocyanine-based Metal Organic Frameworks (based on non-carboxylate linkers)

#### [a] Porph-MOFs based on tetra(4-sulfonatophenyl)porphyrin ligand (Sulfonate ligand, TSPP)

|          |                                                                                                                                                                                             |
|----------|---------------------------------------------------------------------------------------------------------------------------------------------------------------------------------------------|
| • DIBJEF | [Eu <sub>6</sub> (μ <sub>3</sub> -OH) <sub>8</sub> (H <sub>2</sub> O) <sub>2</sub> ](H <sub>2</sub> TSPP) <sub>3</sub> ·2H <sub>2</sub> O                                                   |
| • DIBJIJ | [Eu <sub>6</sub> (μ <sub>6</sub> -O)(μ <sub>3</sub> -OH) <sub>8</sub> (H <sub>2</sub> O) <sub>14</sub> ](H <sub>2</sub> TSPP) <sub>2</sub>                                                  |
| • PUFNUB | [Sm(H <sub>2</sub> TSPP)](H <sub>3</sub> O) <sub>n</sub> ·H <sub>2</sub> O                                                                                                                  |
| • SUBGIH | [Tb(CoTSPP)](H <sub>3</sub> O) <sub>n</sub> ·2H <sub>2</sub> O                                                                                                                              |
| • UQUCUG | [Gd(H <sub>2</sub> TSPP)](H <sub>3</sub> O) <sub>n</sub> ·nH <sub>2</sub> O                                                                                                                 |
| • WADHUH | [Er(VTSP)H <sub>2</sub> O] <sub>n</sub>                                                                                                                                                     |
| • WADJAP | [Tb(VTSP)H <sub>2</sub> O] <sub>n</sub>                                                                                                                                                     |
| • WADJET | [Dy(VTSP)H <sub>2</sub> O] <sub>n</sub>                                                                                                                                                     |
| • XUGWAZ | [Dy(H <sub>2</sub> TSPP)](H <sub>3</sub> O) <sub>n</sub> ·2H <sub>2</sub> O                                                                                                                 |
| • YIVWIL | [Eu(ZnTSPP)](H <sub>3</sub> O) <sub>n</sub>                                                                                                                                                 |
| • LIFWEF | [DyZn(TSPP)H <sub>3</sub> O] <sub>n</sub>                                                                                                                                                   |
| • FASGEO | [SmZn(TSPP)H <sub>3</sub> O] <sub>n</sub> ·2nH <sub>2</sub> O                                                                                                                               |
| • CUNFID | [Nd(TSPP)] <sub>n</sub> ·nH <sub>3</sub> O                                                                                                                                                  |
| • ABEFUL | [Tb(H <sub>2</sub> TSPP)](H <sub>3</sub> O) <sub>n</sub>                                                                                                                                    |
| • RALZAH | [Sm(VOTSP)H <sub>3</sub> O] <sub>n</sub>                                                                                                                                                    |
| • RALZEL | [Sm(VOTSP)H <sub>3</sub> O] <sub>n</sub> ·2N <sub>2</sub>                                                                                                                                   |
| • HIYBEY | [Tb(ZnTSPP)](H <sub>3</sub> O) <sub>n</sub>                                                                                                                                                 |
| • FASGIS | [Tb(H <sub>2</sub> O) <sub>3</sub> (CoTSPP)](H <sub>3</sub> O) <sub>n</sub>                                                                                                                 |
| • FARXUU | [Sm(Histidine)(H <sub>2</sub> O)][Sm(H <sub>3</sub> O) <sub>3</sub> (H <sub>2</sub> TSPP) <sub>2</sub> ]·5H <sub>2</sub> O                                                                  |
| • BIJFIM | {[Co(TSPP)] <sub>2</sub> [Sm(Histidine)(H <sub>2</sub> O)][Sm(H <sub>3</sub> O) <sub>3</sub> ]} <sub>n</sub> ·nH <sub>2</sub> O                                                             |
| • BIJFOS | {[Co(TSPP)] <sub>2</sub> [Eu(Histidine)(H <sub>2</sub> O)][Eu(H <sub>3</sub> O) <sub>3</sub> ]} <sub>n</sub> ·nH <sub>2</sub> O                                                             |
| • BIJFUY | {[Co(TSPP)] <sub>2</sub> [Dy(Histidine)(H <sub>2</sub> O)][Dy(H <sub>3</sub> O) <sub>3</sub> ]} <sub>n</sub> ·nH <sub>2</sub> O                                                             |
| • KAWQOR | [Cu <sub>12</sub> (1,3,5-btc) <sub>8</sub> (C <sub>44</sub> H <sub>24</sub> N <sub>4</sub> Fe)(S)] <sub>n</sub> ; (S = DMA or H <sub>2</sub> O, btc = benzenetricarboxylate)                |
| • KAWQIL | [Zn <sub>24</sub> (1,3,5-btc) <sub>14</sub> (C <sub>44</sub> H <sub>24</sub> N <sub>4</sub> Fe) <sub>2</sub> (S)] <sub>n</sub> ; (S = DMA or H <sub>2</sub> O, btc = benzenetricarboxylate) |
| • ZEVZIM | {[Gd(Histidine)(H <sub>2</sub> O)][Gd(H <sub>3</sub> O) <sub>3</sub> ](H <sub>2</sub> TSPP) <sub>2</sub> }] <sub>n</sub> ·3 nH <sub>2</sub> O                                               |
| • FASGAK | [La(TSPP)] <sub>n</sub> ·nH <sub>5</sub> O <sub>2</sub>                                                                                                                                     |
| • FASFOX | [Sm(TSPP)] <sub>n</sub> ·nH <sub>5</sub> O <sub>2</sub>                                                                                                                                     |
| • FASFUD | [Eu(TSPP)] <sub>n</sub> ·nH <sub>5</sub> O <sub>2</sub>                                                                                                                                     |
| • GOMFOF | (C <sub>44</sub> H <sub>24</sub> K <sub>2</sub> N <sub>4</sub> Na <sub>4</sub> O <sub>12</sub> Pd <sub>1</sub> S <sub>4</sub> ) <sub>n</sub>                                                |

#### [b] Porph-MOFs based on tetra(4-phosphonatophenyl)porphyrin ligand (Phosphonate ligand, TPPP)

|          |                                                                                                                                                                                   |
|----------|-----------------------------------------------------------------------------------------------------------------------------------------------------------------------------------|
| • SOCPEI | [Zn <sub>3</sub> (Ni-H <sub>3</sub> TPPP) <sub>3</sub> ·9(CH <sub>3</sub> ) <sub>2</sub> NH <sub>2</sub> ·3DMF·17H <sub>2</sub> O]                                                |
| • LELQOL | [M <sup>II</sup> (Ni-H <sub>6</sub> TPPP)(H <sub>2</sub> O)]; (M= Mn, Co, Ni, Cd)                                                                                                 |
| • VIBFAQ | [M <sub>2</sub> (Ni-H <sub>2</sub> TPPP)(OH/F) <sub>2</sub> ]·xH <sub>2</sub> O; (M = Zr, Hf)                                                                                     |
| • HIQDUJ | [Co <sub>2</sub> (Ni-H <sub>4</sub> TPPP)]·2DABCO·6H <sub>2</sub> O                                                                                                               |
| • COQKEB | [Na <sub>2</sub> Cu(H <sub>4</sub> TPPP)]·(NH <sub>2</sub> (CH <sub>3</sub> ) <sub>2</sub> )                                                                                      |
| • SAHDEO | [Zn <sub>3</sub> (Ni-H <sub>2</sub> -metaTPPP)(Ni-H <sub>4</sub> -metaTPPP)(Ni-H <sub>5</sub> -metaTPPP)·7(CH <sub>3</sub> ) <sub>2</sub> NH <sub>2</sub> ·DMF·7H <sub>2</sub> O] |

#### [c] MOFs based on phthalocyanine ligand (Octahydroxy phthalocyanine ligand, TCatPc)

|          |                                                                                                                                                 |
|----------|-------------------------------------------------------------------------------------------------------------------------------------------------|
| • IHULEF | [Fe <sub>6</sub> (OH <sub>2</sub> ) <sub>4</sub> (CoTCatPc) <sub>3</sub> ]·[Fe <sub>3</sub> (OH) <sub>3</sub> (OH <sub>2</sub> ) <sub>2</sub> ] |
|----------|-------------------------------------------------------------------------------------------------------------------------------------------------|

#### [d] MOFs based on tetra (3,4,5-trihydroxyphenyl)porphyrin ligand (Gallate ligand, TGalPP)

|          |                                                                                                                       |
|----------|-----------------------------------------------------------------------------------------------------------------------|
| • PEBWEB | {Zr <sub>2</sub> (H <sub>6</sub> -TGalPP)}·(DMA) <sub>n</sub> (H <sub>2</sub> O) <sub>n</sub>                         |
| • PEBWIF | {RE <sub>2</sub> (H <sub>6</sub> -TGalPP)}·(DMA) <sub>n</sub> (H <sub>2</sub> O) <sub>n</sub> ; (RE(III) = Y, La, Ce) |

**[e] MOF based on di(3,4,5-trihydroxyphenyl)porphyrin porphyrin) ligand (Gallate ligand, DGalPP)**

- YUJKIA  $\{Zr(DGalPP)\}_2 \cdot O_2$

**[f] MOF based on tetra (4-tetrazolyphenyl)porphyrin ligand (Tetrazolate ligand, TTzPP)**

- DOZCEC  $[Mn^{II}_{4.5}Cl(Mn^{III}CITzPP)_2(H_2O)_4] \cdot (DEF)_{20} \cdot (CH_3OH)_{18} \cdot (H_2O)_{12}$
- UQOFEN  $Cd_{0.5}[(Cd_4Cl)(TTzPP)_2(CdCl)_4] \cdot Solv$  (Solv = DMA, MeOH or H<sub>2</sub>O)
- UQOFEN01  $[(Cd_4Cl)(TTzPP)_2(CdCl)_4] \cdot Solv$  (Solv = DMA, MeOH or H<sub>2</sub>O)
- UQOFIR  $[(Cd_{2.5}Cl)(H_2TTzPP)_2(CdCl)_4] \cdot Solv$  (Solv = DMA, MeOH or H<sub>2</sub>O)
- UQODUB  $[(Cd_3Cl)(TTzPP)_2(CdCl)_4] \cdot Solv$  (Solv = DMA, MeOH or H<sub>2</sub>O)
- UQOFAJ  $Na_2[(Cd_{3.5}Cl)(TTzPP)_2(CdCl)_4] \cdot Solv$  (Solv = DMA, MeOH or H<sub>2</sub>O)
- UQOFOX  $Mn_{0.4}[(Mn_{0.5}Cl)(H_2TTzPP)_2(MnCl)_4] \cdot Solv$  (Solv = DMA, MeOH or H<sub>2</sub>O)
- DAMRER  $[Fe^{II}pzTTzPP(Fe^{II}_{1-x}DMF_{1-x}Fe^{III}_xOH_x)]$  ( $x \geq 0.25$ )
- DAMRAN  $[Fe^{II}DABCOTTzTP(Fe^{II}_{1-x}DMF_{1-x}Fe^{III}_xOH_x)]_n$  (DABCO = 1,4-diazabicyclo(2.2.2)octane)
- FINCIR  $[Cu_{4.5}((H_4TTzPP)(TTzPP)Cl_2)(H_2O)_{0.5}] \cdot CH_3NH_2CH_3 \cdot 7EtOH \cdot 8H_2O$

**[g] MOF based on tetra(1H-pyrazol-4-yl)porphyrin ligand (Pyrazolate ligand, TPzP)**

- MALMAQ  $[Ni_8(OH)_4(H_2O)_2](NiTPzP)_3$

**[h] MOF based on tetra(1H-pyrazol-4-yl)phenyl porphyrin ligand (Pyrazolate ligand, TPzPP)**

- BALNAG  $[Ni_8(OH)_4(H_2O)_2](NiTPzPP)_3$
